# Supplementary material for: Silencing NKD2 by promoter region hypermethylation promotes gastric cancer invasion and metastasis by up-regulating SOX18 in human gastric cancer
Source: PubMed Central journal article supplement (PMC4741779; doi:10.18632/oncotarget.5272), 2015-09-14
Supplement: oncotarget-06-33470-s001.pdf [file oncotarget-06-33470-s001.pdf]

**SUPPLEMENTARY TABLE****Supplementary Table S1: Primer Sequences****RT-PCR primers**

NKD1-F: 5'-AACCCTACTTAGATCTCGCCG-3'

NKD1-R: 5'-GAGCCGTTGCTGGAGCTCTG-3'

NKD2-F: 5'-ACAGGAGGTTGTCTGCACACG-3'

NKD2-R: 5'-GACTTGAGGAACTGCTTCTCCG-3'

GAPDH-F: 5'-GACCACAGTCCATGCCATCAC-3'

GAPDH-R: 5'-GTCCACCACCCTGTTGCTGTA-3'

**MSP primers**

NKD1-ME-F: 5'-GTTTCGGCGTTTTTCGGGCGTTAGTC-3'

NKD1-UN-F: 5'-GGGTTTGGTGTTTTTGGGTGTTAGTT-3'

NKD1-ME-R: 5'-AAATTTCCCCATACTAAACTACGACG-3'

NKD1-UN-R: 5'-TAAAATTTCCCCATACTAAACTACAACA-3'

NKD2-ME-F: 5'-GATCGTAGGGGATAGTTTCGTGGC-3'

NKD2-UN-F: 5'-TGGATTGTAGGGGATAGTTTGTGGT-3'

NKD2-ME-R: 5'-AAAACAACCTAACACCGCTCCCCG-3'

NKD2-UN-R: 5'-CAAAAACAACCTAACACCACTCCCCA-3'

**BSSQ primers**

NKD1-F: 5'-ATGYGTYGTATYGGTTAATGGG-3'

NKD1-R: 5'-AACRAAAACACTAACCCRACTTA-3'

NKD2-F: 5'-GGGGATATAGYGAAGGYGTAG-3'

NKD2-R: 5'-TACRACCATAACRACCCACRTC-3'

**siRNA duplex sequence**

NKD2-F: 5'-GGGAUUGAGAACUACACGUTT-3'

NKD2-R: 5'-ACGUGUAGUUCUCAAUCCCTT-3'

SOX18-F: 5'-CUCUCUCAUACGCGUGUAUTT-3'

SOX18-R: 5'-AUACACGCGUAUGAGAGAGTT-3'

Negative Control-F: 5'-UUCUCCGAACGUGUCACGUTT-3'

Negative Control-R: 5'-ACGUGACACGUUCGGAGAATT-3'
